# Supplementary material for: Analysis of immune-related signatures of lung adenocarcinoma identified two distinct subtypes: implications for immune checkpoint blockade therapy
Source: PubMed Central journal article supplement (PMC7066911; doi:10.18632/aging.102814), 2020-02-24
Supplement: aging-12-102814-s003..pdf [file aging-12-102814-s003..pdf]

## SUPPLEMENTARY TABLES

Please browse Full Text version to see the data of Supplementary Table 1

**Supplementary Table 1. 433 genes with FDR less than 0.05 in univariate survival analysis.**

**Supplementary Table 2. 126 genes were obtained through RFE features selection.**

| Gene      | Entrezid | Gene      | Entrezid | Gene     | Entrezid | Gene     | Entrezid |
|-----------|----------|-----------|----------|----------|----------|----------|----------|
| TSPAN32   | 10077    | NCR3      | 259197   | MCM10    | 55388    | CCNB1    | 891      |
| RASGRP2   | 10235    | ASPM      | 259266   | DEPDC1   | 55635    | SELENBP1 | 8991     |
| CDKN3     | 1033     | STAP1     | 26228    | PBK      | 55872    | PRC1     | 9055     |
| NDC80     | 10403    | AMPD1     | 270      | KIF15    | 56992    | CD1B     | 910      |
| CENPA     | 1058     | HPGDS     | 27306    | PTGDS    | 5730     | CD1C     | 911      |
| CENPE     | 1062     | GNG7      | 2788     | SPC25    | 57405    | CD1D     | 912      |
| RAD51AP1  | 10635    | LINC00926 | 283663   | DNASE2B  | 58511    | CD1E     | 913      |
| PLK4      | 10733    | C11orf21  | 29125    | RGS13    | 6003     | CCNB2    | 9133     |
| KIF2C     | 11004    | RACGAP1   | 29127    | RRM2     | 6241     | EXO1     | 9156     |
| UBE2C     | 11065    | HLA-DOB   | 3112     | BLK      | 640      | CD5      | 921      |
| CHEK1     | 1111     | BIRC3     | 330      | NCAPG    | 64151    | AURKB    | 9212     |
| ZWINT     | 11130    | BIRC5     | 332      | SFTPB    | 6439     | CACNA2D2 | 9254     |
| OIP5      | 11339    | IL16      | 3603     | SLAMF1   | 6504     | CD19     | 930      |
| FCRL1     | 115350   | KLRB1     | 3820     | SLC18A2  | 6571     | MS4A1    | 931      |
| CCR6      | 1235     | KIF11     | 3832     | SPIB     | 6689     | SIGLEC6  | 946      |
| ADH1A     | 124      | LY9       | 4063     | AURKA    | 6790     | KIF23    | 9493     |
| ADH1B     | 125      | MAD2L1    | 4085     | BUB1B    | 701      | CD40LG   | 959      |
| COL4A3    | 1285     | MAL       | 4118     | TK1      | 7083     | ESPL1    | 9700     |
| CR2       | 1380     | MKI67     | 4288     | CLEC3B   | 7123     | CD79A    | 973      |
| CTSG      | 1511     | MYBL2     | 4605     | TOP2A    | 7153     | CD79B    | 974      |
| DNASE1L3  | 1776     | NEK2      | 4751     | TTK      | 7272     | ACAP1    | 9744     |
| FAM129C   | 199786   | PAX5      | 5079     | CCR2     | 729230   | DLGAP5   | 9787     |
| SKA1      | 220134   | NUSAP1    | 51203    | VIPR1    | 7433     | CDK1     | 983      |
| MS4A2     | 2206     | GTSE1     | 51512    | DSCC1    | 79075    | MELK     | 9833     |
| FCER2     | 2208     | PLK1      | 5347     | ANKRD55  | 79722    | CDC6     | 990      |
| TMEM130   | 222865   | POLE2     | 5427     | CXorf21  | 80231    | CDC20    | 991      |
| TPX2      | 22974    | ERCC6L    | 54821    | TRAF3IP3 | 80342    | KIF14    | 9928     |
| FOXM1     | 2305     | PARPBP    | 55010    | TLR10    | 81793    | CD302    | 9936     |
| NCAPH     | 23397    | CEP55     | 55165    | CDC45    | 8318     | CDC25C   | 995      |
| TNFRSF13B | 23495    | FANCI     | 55215    | ATP13A4  | 84239    | HS3ST2   | 9956     |
| LILRA4    | 23547    | NEIL3     | 55247    | FCRLA    | 84824    |          |          |
| KIF4A     | 24137    | HJURP     | 55355    | CCNA2    | 890      |          |          |

**Supplementary Table 3. Distinct clinical characteristics between 2 LUAD subtypes.**

| <b>Characteristics</b> | <b>Low risk (n=210)</b> | <b>High risk (n=256)</b> | <b>P</b> |
|------------------------|-------------------------|--------------------------|----------|
| Age (years )           | 66.6±9.1                | 64.2±10.6                | 0.125    |
| Gender                 |                         |                          |          |
| Female                 | 137 (65.2)              | 120 (46.9)               | <0.001   |
| Male                   | 73 (34.8)               | 136 (53.1)               |          |
| Stage                  |                         |                          |          |
| I                      | 139 (66.2)              | 115 (44.9)               | <0.001   |
| II                     | 38 (18.1)               | 74 (28.9)                |          |
| III                    | 25 (11.9)               | 50 (19.5)                |          |
| IV                     | 8 (3.8)                 | 17 (6.6)                 |          |
| Smoking status         |                         |                          |          |
| Never smoker           | 39 (18.6)               | 31 (12.1)                | <0.001   |
| Non-smoker>15 years    | 69 (32.9)               | 52 (20.3)                |          |
| Non-smoker≤15 years    | 67 (31.9)               | 95 (37.1)                |          |
| Current smoker         | 35 (16.7)               | 78 (30.5)                |          |

**Supplementary Table 4. Summary of TCGA and 9 validation datasets included in this study.**

| <b>Datasets</b> | <b>Platforms</b>                                          | <b>Sample size</b> |
|-----------------|-----------------------------------------------------------|--------------------|
| TCGA            | Illumina RNAseq HTSeq                                     | 502                |
| GSE72094        | Rosetta/Merck Human RSTA Custom Affymetrix 2.0 microarray | 398                |
| GSE68465        | Affymetrix Human Genome U133A Array                       | 442                |
| GSE50081        | Affymetrix Human Genome U133 Plus 2.0 Array               | 127                |
| GSE42127        | Illumina HumanWG-6 v3.0 expression beadchip               | 132                |
| GSE41271        | Illumina HumanWG-6 v3.0 expression beadchip               | 181                |
| GSE31210        | Affymetrix Human Genome U133 Plus 2.0 Array               | 226                |
| GSE30219        | Affymetrix Human Genome U133 Plus 2.0 Array               | 85                 |
| GSE13213        | Agilent-014850 Whole Human Genome Microarray 4x44K G4112F | 117                |
| GSE11969        | Agilent Homo sapiens 21.6K custom array                   | 90                 |
| Total           |                                                           | 2300               |

**Supplementary Table 5. Descriptions of clinical characteristics for LUAD patients in TCGA and 9 validation datasets.**

| Characteristics      | TCGA       | GSE72094   | GSE68465    | GSE50081   | GSE42127    | GSE41271    | GSE31210   | GSE30219   | GSE13213    | GSE11969   |
|----------------------|------------|------------|-------------|------------|-------------|-------------|------------|------------|-------------|------------|
| Number of            | 502        | 398        | 422         | 127        | 132         | 181         | 226        | 85         | 117         | 90         |
| Age (years)          | 65.3 ± 9.9 | 69.4 ± 9.5 | 64.5 ± 10.1 | 68.7 ± 9.7 | 65.8 ± 10.3 | 64.6 ± 10.4 | 59.6 ± 7.4 | 61.5 ± 9.3 | 60.7 ± 10.2 | 61.1 ± 9.8 |
| Gender               |            |            |             |            |             |             |            |            |             |            |
| Male                 | 209        | 174        | 219         | 65         | 67          | 91          | 105        | 66         | 60          | 47         |
| Female               | 257        | 219        | 214         | 62         | 65          | 90          | 121        | 19         | 56          | 43         |
| Stage                |            |            |             |            |             |             |            |            |             |            |
| I                    | 254        | 254        |             | 92         | 89          | 95          | 168        |            | 78          | 52         |
| II                   | 112        | 67         | -           | 35         | 22          | 27          | 58         | -          | 13          | 13         |
| III                  | 75         | 57         | -           | 0          | 20          | 43          | 0          | -          | 25          | 25         |
| IV                   | 25         | 15         | -           | 0          | 1           | 16          | 0          | -          | -           | -          |
| Grade                |            |            |             |            |             |             |            |            |             |            |
| G1                   |            |            | 60          |            |             |             |            |            |             | 25         |
| G2                   | -          | -          | 208         | -          | -           | -           | -          | -          | -           | 31         |
| G3                   | -          | -          | 165         | -          | -           | -           | -          | -          | -           | 34         |
| Smoking status       |            |            |             |            |             |             |            |            |             |            |
| Never smoker         | 70         | 298        | 15          | 23         |             | 25          | 111        |            | 55          | 45         |
| Ever smoker          | -          | 30         | 94          | 56         | -           | 156         | 115        | -          | 61          | 45         |
| Current smoker       | 113        | -          | 16          | 36         | -           | -           | -          | -          | -           | -          |
| Non-smoker>15        | 121        | -          | -           | -          | -           | -           | -          | -          | -           | -          |
| Non-smoker≤ 15 years | 162        | -          | -           | -          | -           | -           | -          | -          | -           | -          |
| NA                   | -          | 65         | 90          | 12         | -           | -           | -          | -          | -           | -          |
