# Supplementary material for: Analysis of immune-related signatures of lung adenocarcinoma identified two distinct subtypes: implications for immune checkpoint blockade therapy
Source: Aging (Albany NY). 2020 Feb 24;12(4):3312–39. doi: 10.18632/aging.102814 (PMC7066911; doi:10.18632/aging.102814)
Supplement: Supplementary Figures [file aging-12-102814-s004..pdf]

## SUPPLEMENTARY FIGURES

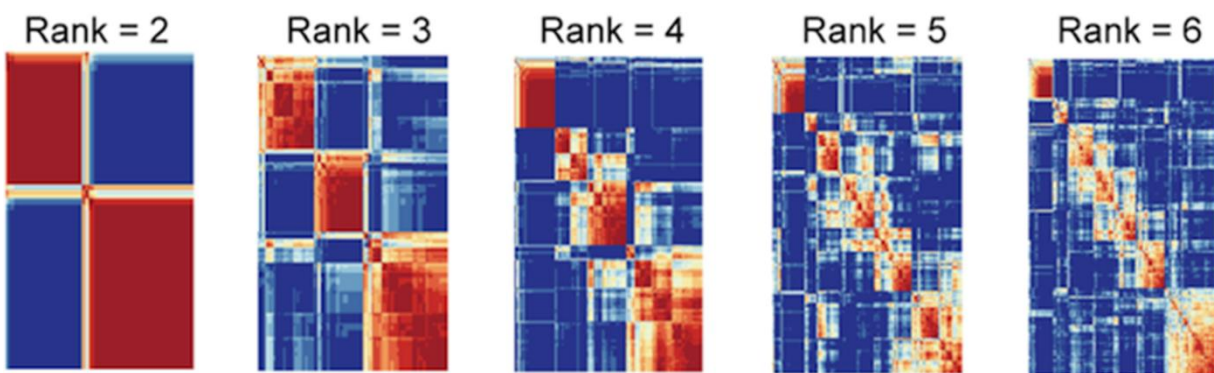

Supplementary Figure 1. Heatmap representation of NMF clustering.

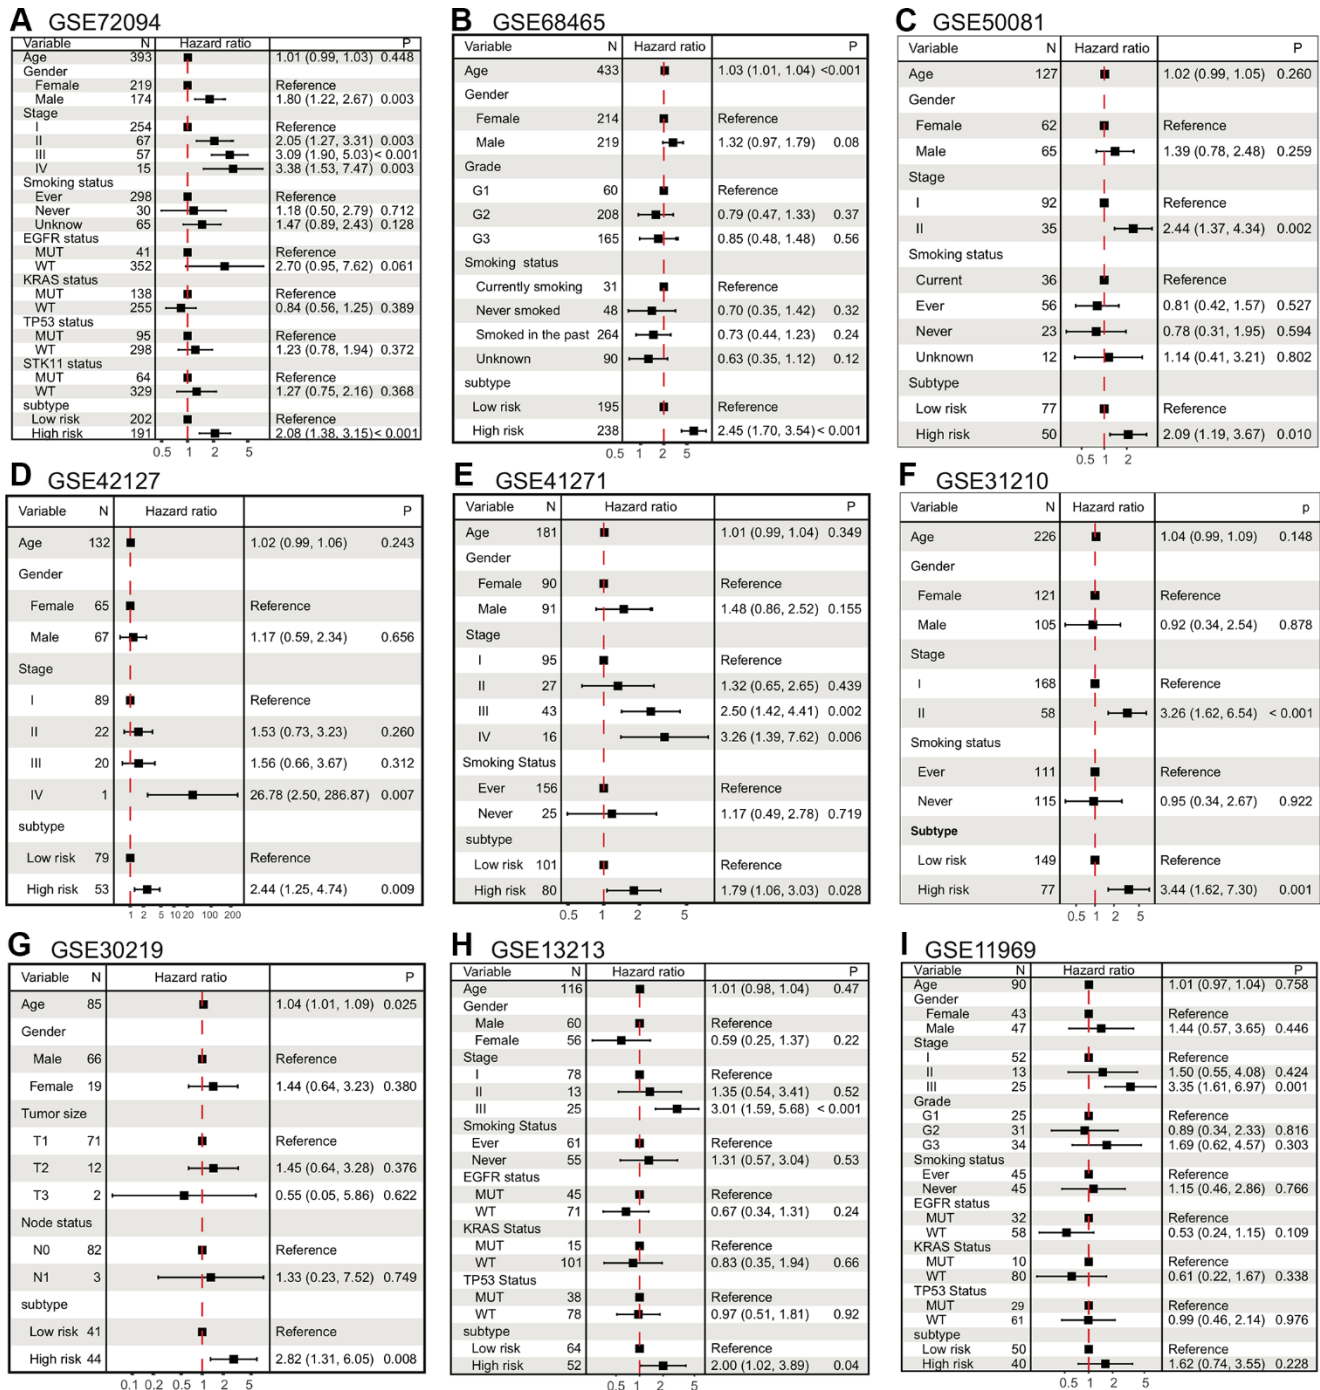

**Supplementary Figure 2.** Prognostic significance of high-risk versus low-risk subtypes using multivariate Cox model in 9 validation cohorts of (A) GSE72094, (B) GSE68465, (C) GSE50081, (D) GSE42127, (E) GSE41271, (F) GSE31210, (G) GSE30219, (H) GSE13213, and (I) GSE11969

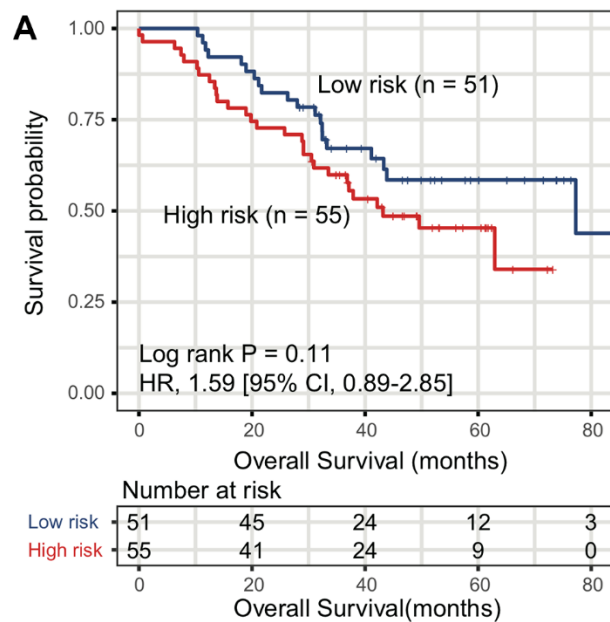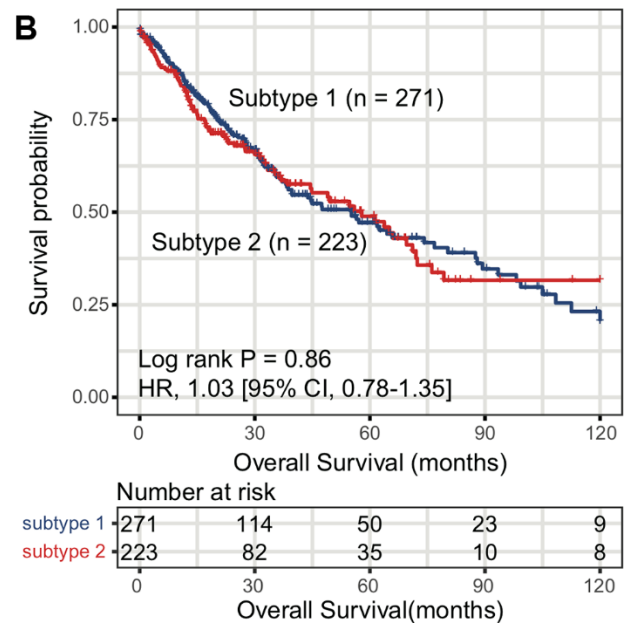

**Supplementary Figure 3.** (A) Kaplan-Meier plot of identified 2 subtypes in GSE81089 dataset. (B) Kaplan-Meier plot of identified TCGA LUSC subtypes.

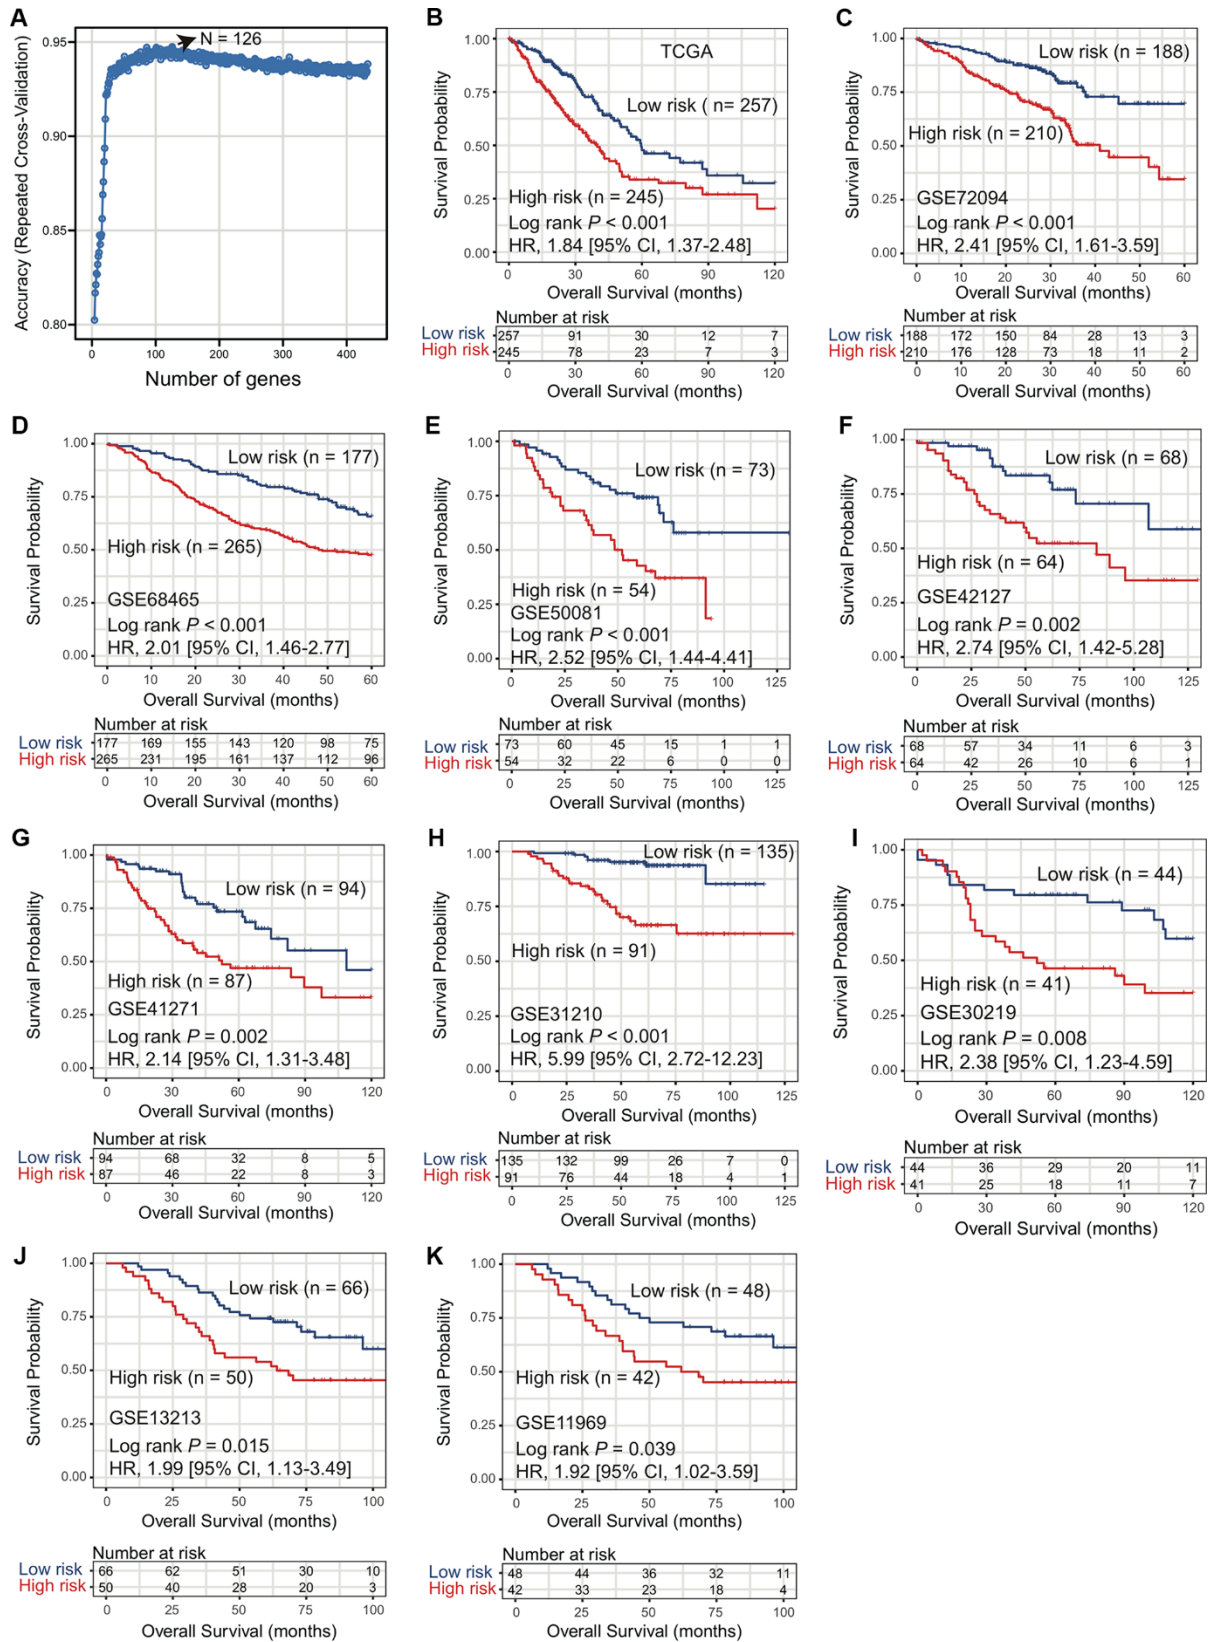

**Supplementary Figure 4.** (A) Relation between classification accuracy and selected genes via recursive feature elimination algorithm. (B–K) Kaplan-Meier plot of identified subtypes using 126 genes in TCGA and 9 validation cohorts.

**A GSE72094**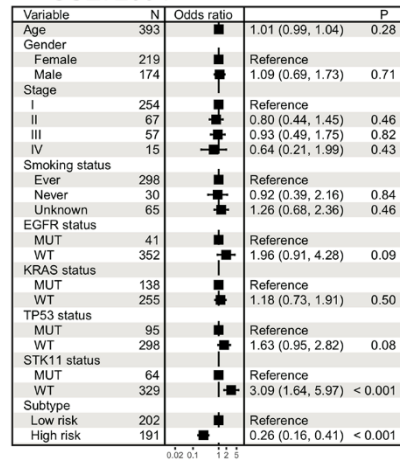**B GSE68465**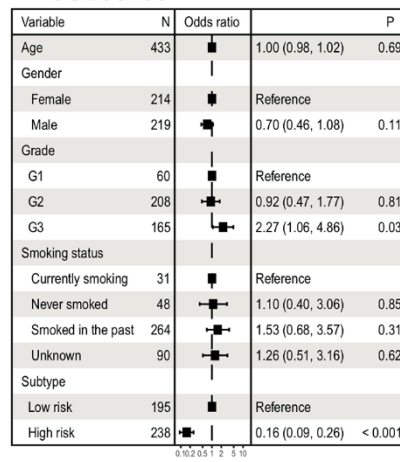**C GSE50081**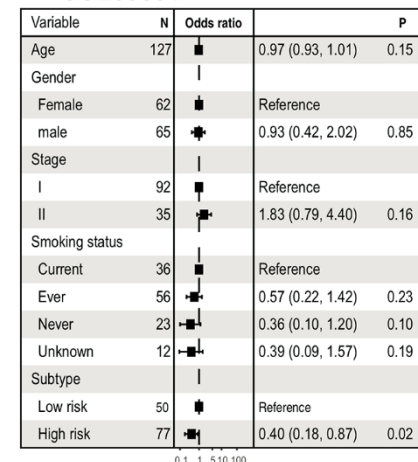**D GSE42127**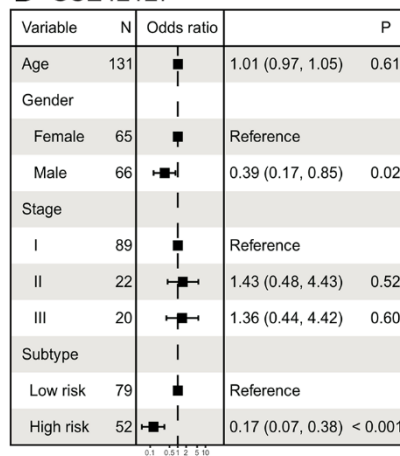**E GSE41271**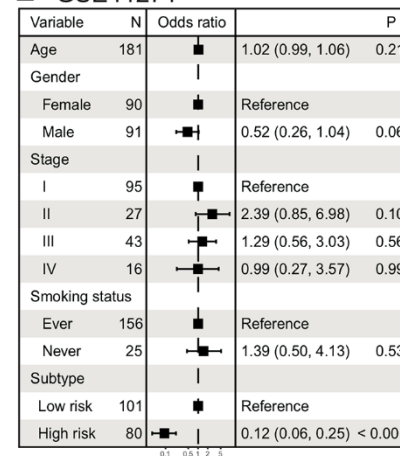**F GSE31210**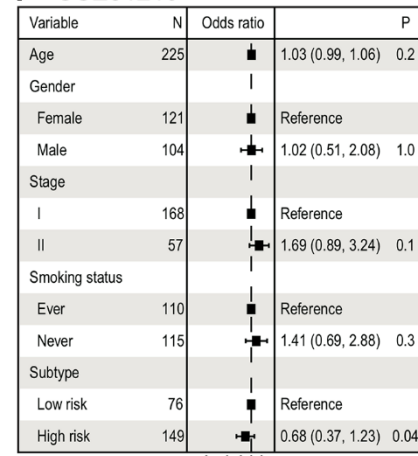**G GSE30219**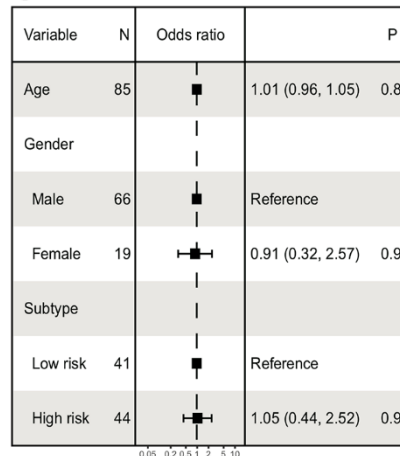**H GSE13213**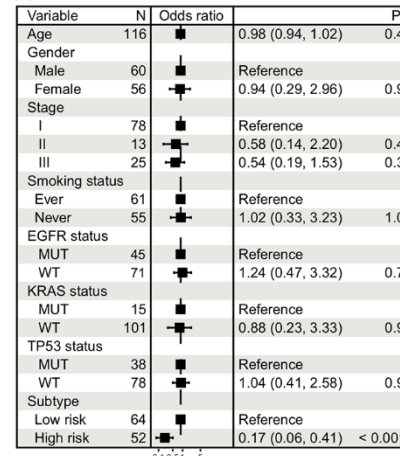**I GSE11969**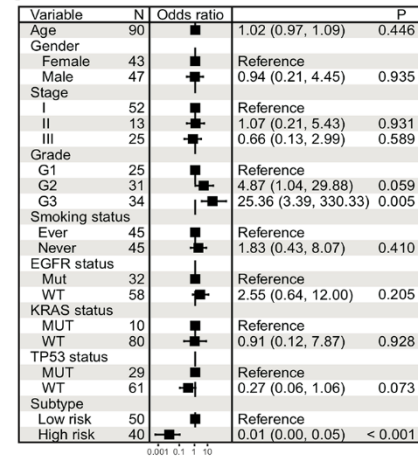

**Supplementary Figure 5.** Association of identified LUAD subtypes with TIDE score using multivariate logistic analysis in 9 validation cohorts of (A) GSE72094, (B) GSE68465, (C) GSE50081, (D) GSE42127, (E) GSE41271, (F) GSE31210, (G) GSE30219, (H) GSE13213, and (I) GSE11969.

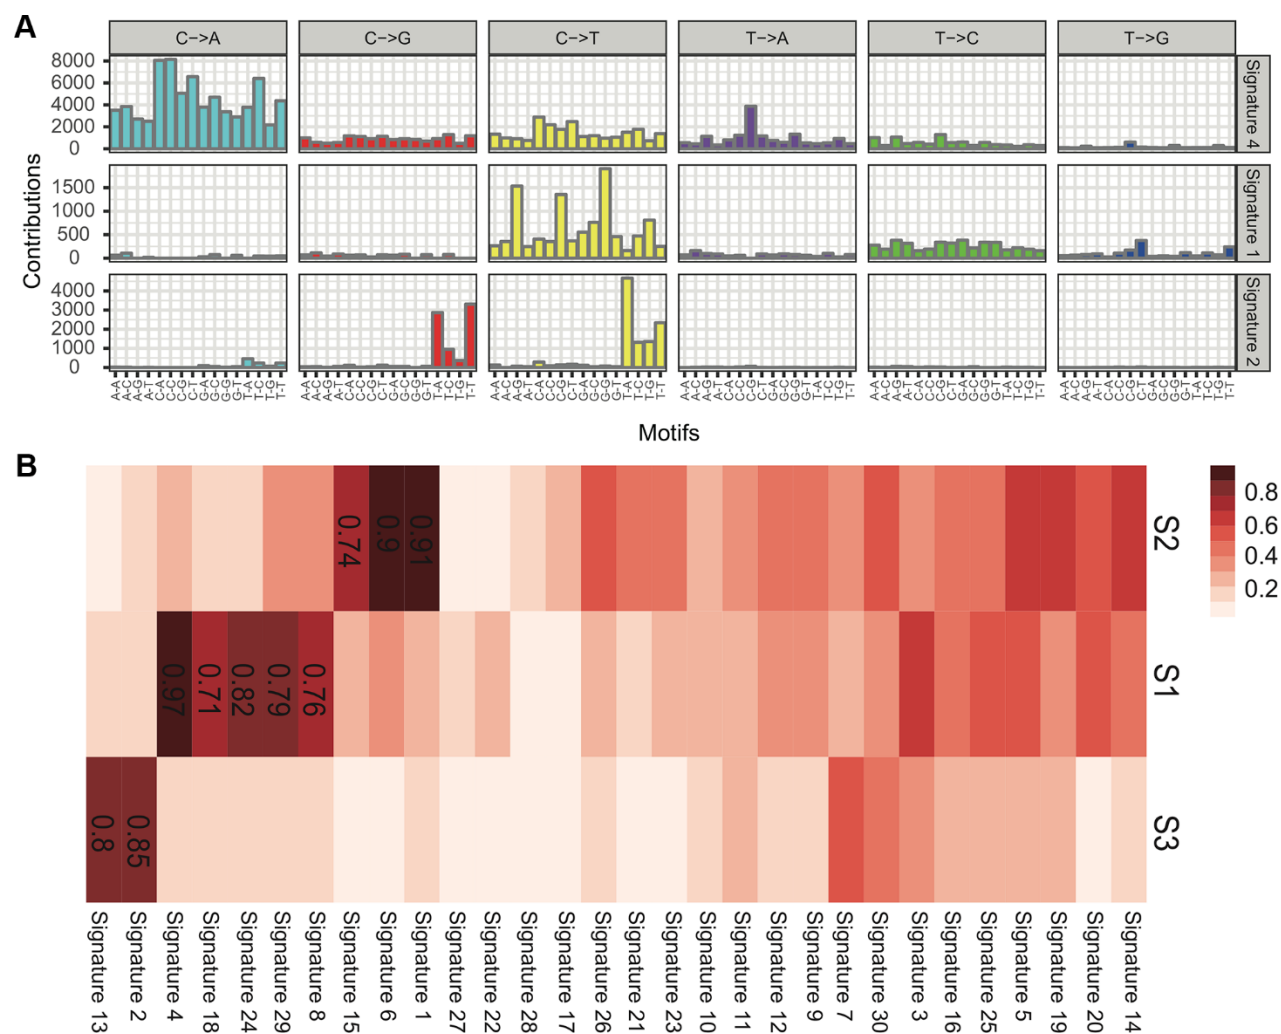

**Supplementary Figure 6.** (A) Mutational signatures extracted from TCGA LUAD cohort and (B) their cosine similarity with COSMIC mutational signatures.

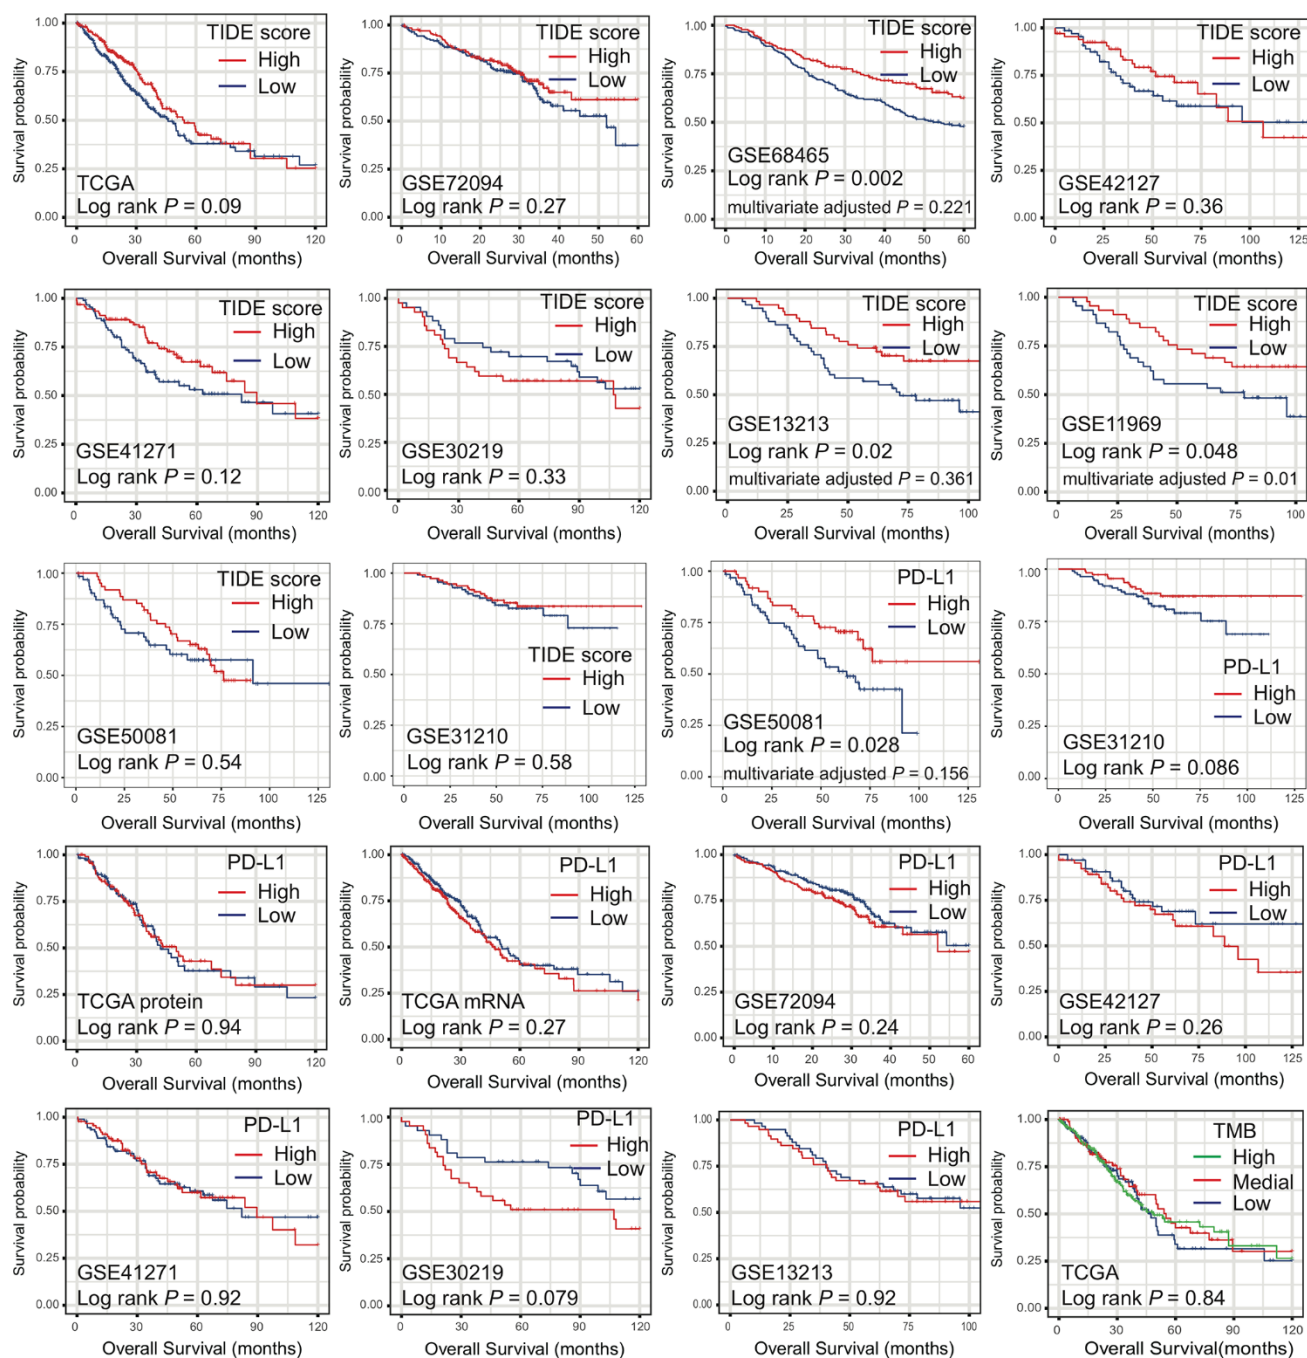

**Supplementary Figure 7. Kaplan-Meier plots with respect to TIDE score, PD-L1 expression, and TMB in TCGA and 9 validation cohorts.**

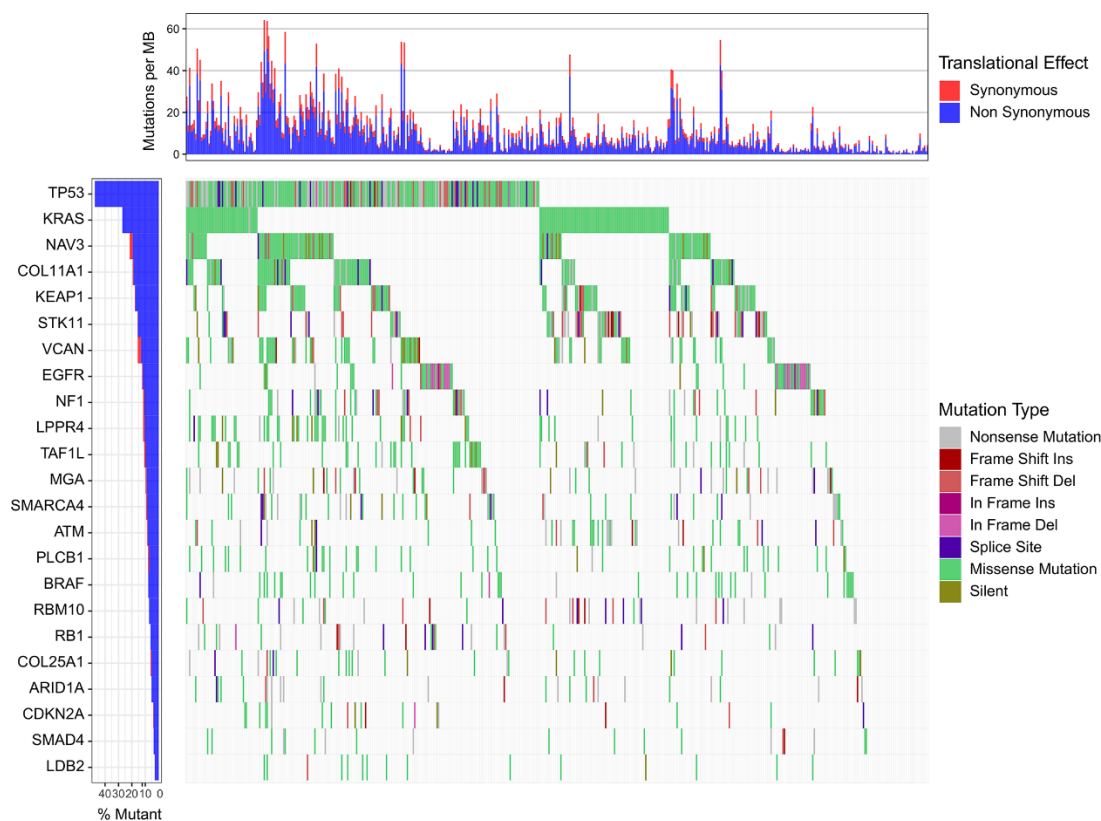

Supplementary Figure 8. Mutational landscape of SMGs in TCGA LUAD cohort.

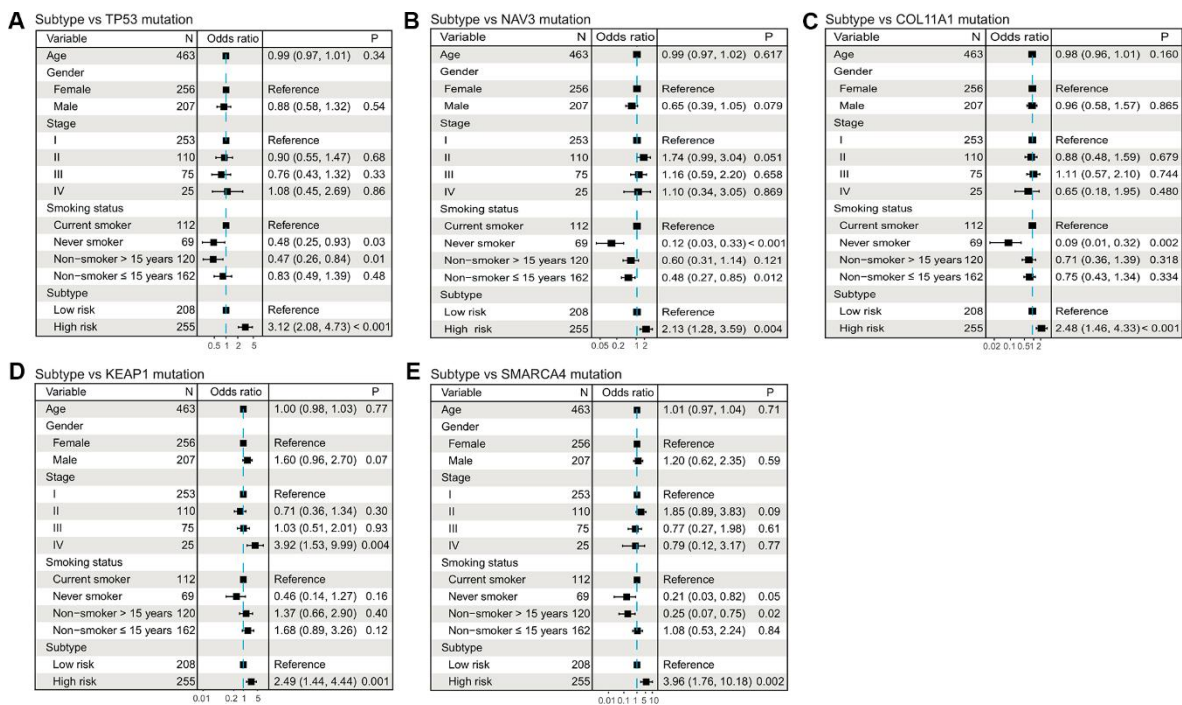

Supplementary Figure 9. Associations between mutations in *TP53*, *NAV3*, *CLO11A1*, *KEAP1* and *SMARCA4* and identified 2 LUAD subtypes using multivariate logistic analysis.

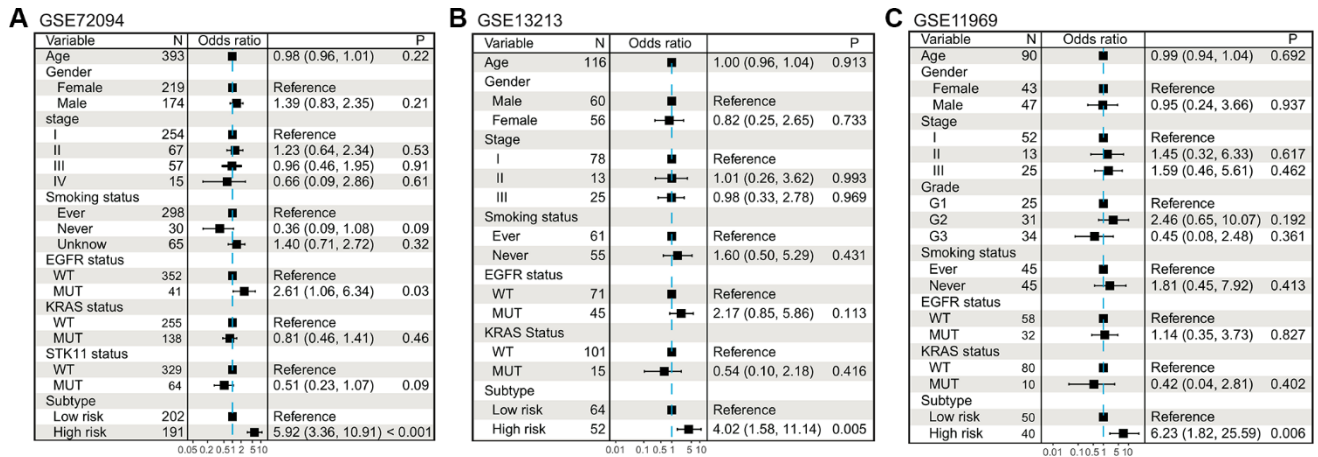

**Supplementary Figure 10.** Associations of *TP53* mutation with high-risk subtype in (A) GSE72094, (B) GSE13213 and (C) GSE11969.

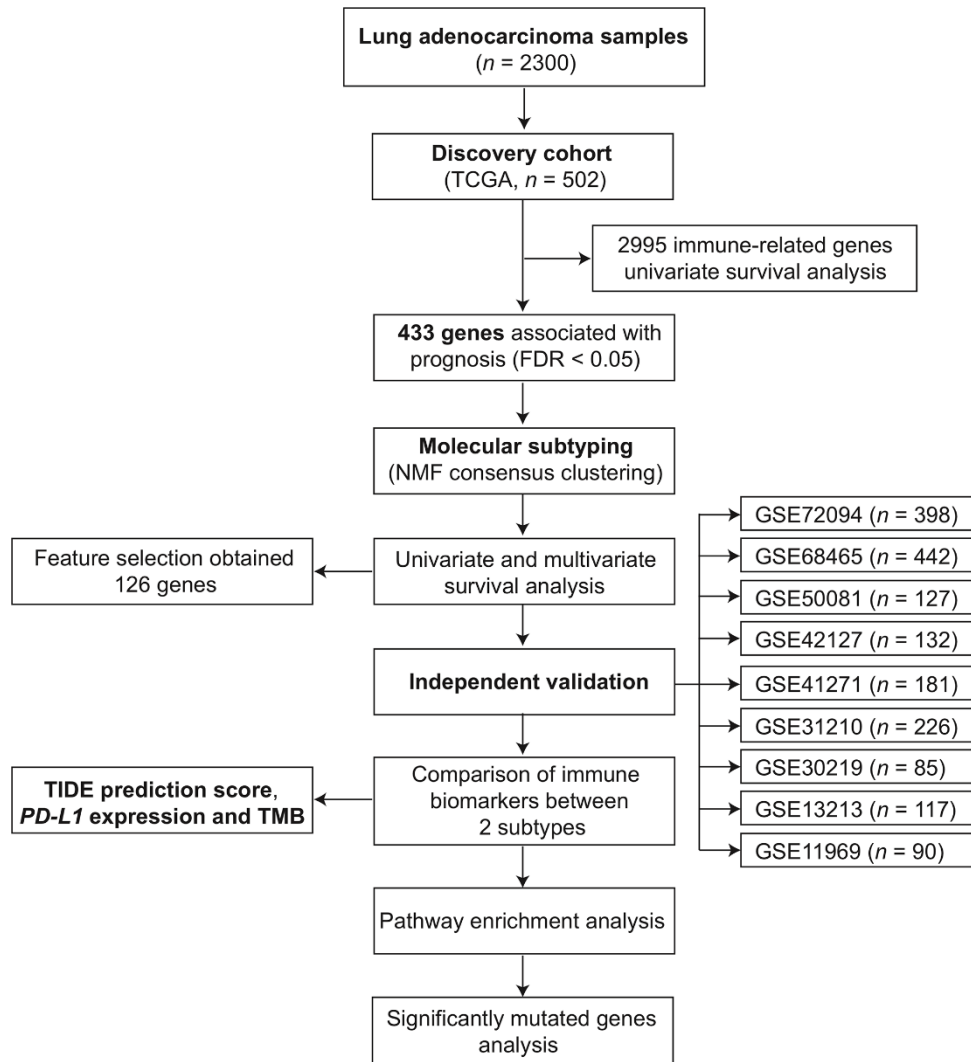

**Supplementary Figure 11.** Flow chart of our study. TCGA and 9 public LUAD cohorts containing 2300 samples were included to perform relevant analyses.
